# Supplementary material for: Understanding Hydrological Processes under Land Use Land Cover Change in the Upper Genale River Basin, Ethiopia
Source: MDPI journal article supplement (doi:10.3390/w14233881), 2022-11-28
Supplement: s1 [file s1]

Table S1. Simulated spatial distribution of Runoff, Evapotranspiration, and total water yield for 1986, 2001, and 2016 LULC scenarios.

| Subbasin | 1986 LULC  |         |                  | 2001 LULC  |         |                 | 2016 LULC  |         |                 |
|----------|------------|---------|------------------|------------|---------|-----------------|------------|---------|-----------------|
|          | Runoff(mm) | ET (mm) | Water yield (mm) | Runoff(mm) | ET (mm) | Water yield(mm) | Runoff(mm) | ET (mm) | Water yield(mm) |
| 1        | 60.63      | 635.91  | 198.02           | 70.22      | 617.58  | 215.15          | 63.20      | 633.93  | 199.57          |
| 2        | 51.98      | 598.61  | 200.91           | 70.37      | 563.61  | 236.59          | 57.10      | 587.20  | 212.81          |
| 3        | 294.52     | 587.41  | 689.98           | 327.05     | 588.04  | 688.51          | 327.02     | 590.36  | 685.72          |
| 4        | 54.44      | 730.21  | 100.60           | 77.33      | 699.38  | 131.94          | 83.57      | 687.07  | 142.31          |
| 5        | 427.51     | 581.06  | 985.77           | 443.09     | 579.66  | 986.89          | 476.65     | 582.21  | 983.99          |
| 6        | 33.32      | 699.92  | 139.65           | 45.38      | 691.81  | 148.21          | 43.96      | 685.46  | 155.71          |
| 7        | 154.05     | 823.14  | 452.40           | 195.52     | 800.04  | 475.48          | 209.12     | 790.78  | 484.67          |
| 8        | 110.92     | 816.38  | 453.93           | 160.43     | 804.50  | 465.91          | 173.70     | 787.01  | 483.34          |
| 9        | 225.73     | 617.84  | 571.57           | 258.48     | 605.59  | 583.31          | 281.48     | 600.65  | 588.69          |
| 10       | 224.34     | 783.11  | 489.53           | 259.87     | 744.06  | 528.26          | 291.52     | 702.71  | 569.32          |
| 11       | 250.82     | 649.52  | 536.75           | 258.90     | 645.09  | 540.62          | 296.83     | 636.86  | 549.33          |
| 12       | 196.64     | 625.73  | 564.01           | 208.31     | 614.16  | 575.59          | 238.94     | 605.06  | 584.61          |
| 13       | 219.52     | 841.70  | 430.29           | 243.12     | 816.69  | 454.97          | 274.34     | 787.32  | 484.02          |
| 14       | 189.54     | 736.17  | 244.48           | 185.86     | 734.47  | 245.68          | 199.85     | 730.24  | 253.51          |
| 15       | 94.52      | 968.37  | 298.23           | 159.50     | 895.00  | 370.45          | 182.64     | 856.14  | 409.33          |
| 16       | 162.41     | 765.53  | 221.47           | 188.09     | 739.57  | 246.39          | 197.26     | 738.98  | 250.14          |
| 17       | 61.49      | 614.57  | 66.80            | 61.58      | 610.59  | 66.91           | 64.65      | 612.39  | 70.28           |
| 18       | 35.95      | 630.46  | 48.44            | 38.00      | 629.84  | 50.68           | 41.18      | 628.88  | 54.89           |
| 19       | 38.56      | 626.68  | 52.85            | 38.17      | 625.26  | 52.22           | 40.77      | 626.34  | 56.32           |
| 20       | 7.75       | 586.79  | 11.35            | 7.53       | 586.71  | 11.30           | 9.72       | 585.43  | 13.93           |
| 21       | 42.82      | 623.36  | 55.72            | 42.82      | 620.37  | 57.19           | 49.56      | 622.07  | 61.23           |
| Average  | 139.87     | 692.50  | 324.42           | 159.03     | 676.76  | 339.63          | 171.57     | 670.34  | 347.32          |
